# Supplementary material for: Why Lyme disease is common in the northern US, but rare in the south: The roles of host choice, host-seeking behavior, and tick density
Source: PLoS Biol. 2021 Jan 28;19(1):e3001066. doi: 10.1371/journal.pbio.3001066 (PMC7842935; doi:10.1371/journal.pbio.3001066)
Supplement: S8 Data — (XLSX) [file pbio.3001066.s012.xlsx]

## Sheet: larvae
site	mice		site	voles		site	shrews		site	other small mammals		site	medium mammals			site	skinks		site	other lizards		site	snakes
WI	4.411		WI	1.292		WI	3.444		WI	2.733		WI	5.478			WI	1.75		WI			WI	0
MA	1.77		MA	3.706		MA	2.826		MA	0.25		MA	0			MA			MA			MA	0
NJ	3.517		NJ	4		NJ	0		NJ			NJ	0			NJ			NJ	0.214		NJ	0
NC	0.54		NC			NC			NC			NC	0.19			NC	1.833		NC			NC
TN	0.058		TN			TN	0		TN			TN	0			TN	0.5		TN	0		TN	0
SC	0.75		SC			SC	0		SC	0		SC	0			SC	0.875		SC	0.034		SC	0
AL	0.235		AL			AL	1.5		AL	0		AL	0			AL	3		AL	0		AL
FL	0.084		FL			FL			FL	0		FL	0.063			FL	3.552		FL	0.5		FL	0

## Sheet: nymphs
site	mice		site	voles		site	shrews		site	other small mammals		site	medium mammals			site	skinks		site	other lizards		site	snakes
WI	0.414		WI	0.226		WI	0.043		WI	2.267		WI	2.773			WI	0		WI			WI	0
MA	0.226		MA	0.176		MA	0.034		MA	0		MA	0			MA			MA			MA	0
NJ	0.121		NJ	0		NJ	0		NJ			NJ	0			NJ			NJ	0		NJ
NC	0.02		NC			NC			NC			NC	0.143			NC	0.091		NC			NC
TN	0.035		TN	0		TN			TN	0		TN	0			TN	0.5		TN	0.5		TN	0
SC	0.103		SC			SC	0		SC	0		SC	0.042			SC	0.214		SC	0.034		SC	0
AL	0		AL			AL			AL			AL	0			AL	1.8		AL	0.5		AL
FL	0.01		FL			FL			FL	0		FL	0			FL	3.254		FL	0.154		FL
